# Supplementary material for: Development of a porcine model of phenylketonuria with a humanized R408W mutation for gene editing
Source: PubMed Central journal article supplement (PMC7833140; doi:10.1371/journal.pone.0245831), 2021-01-25

# Figure 4B source gel

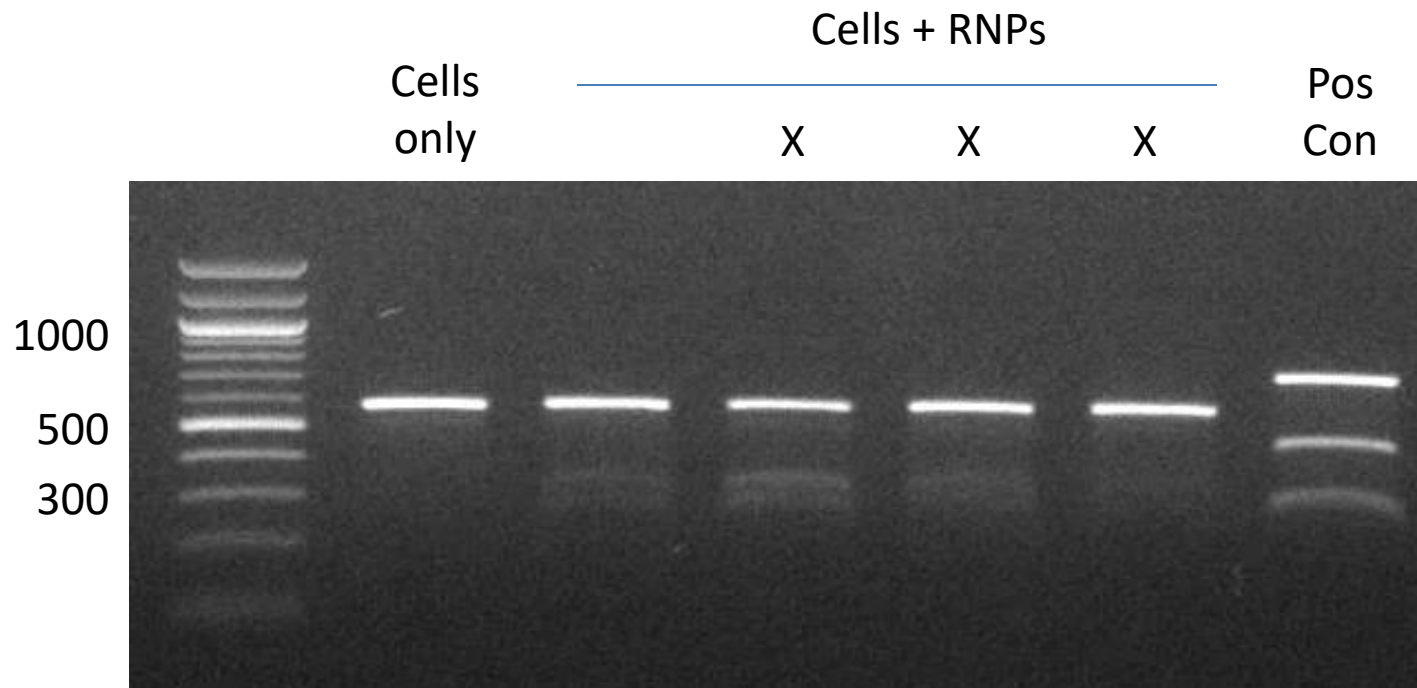

# Figure 4D source gel

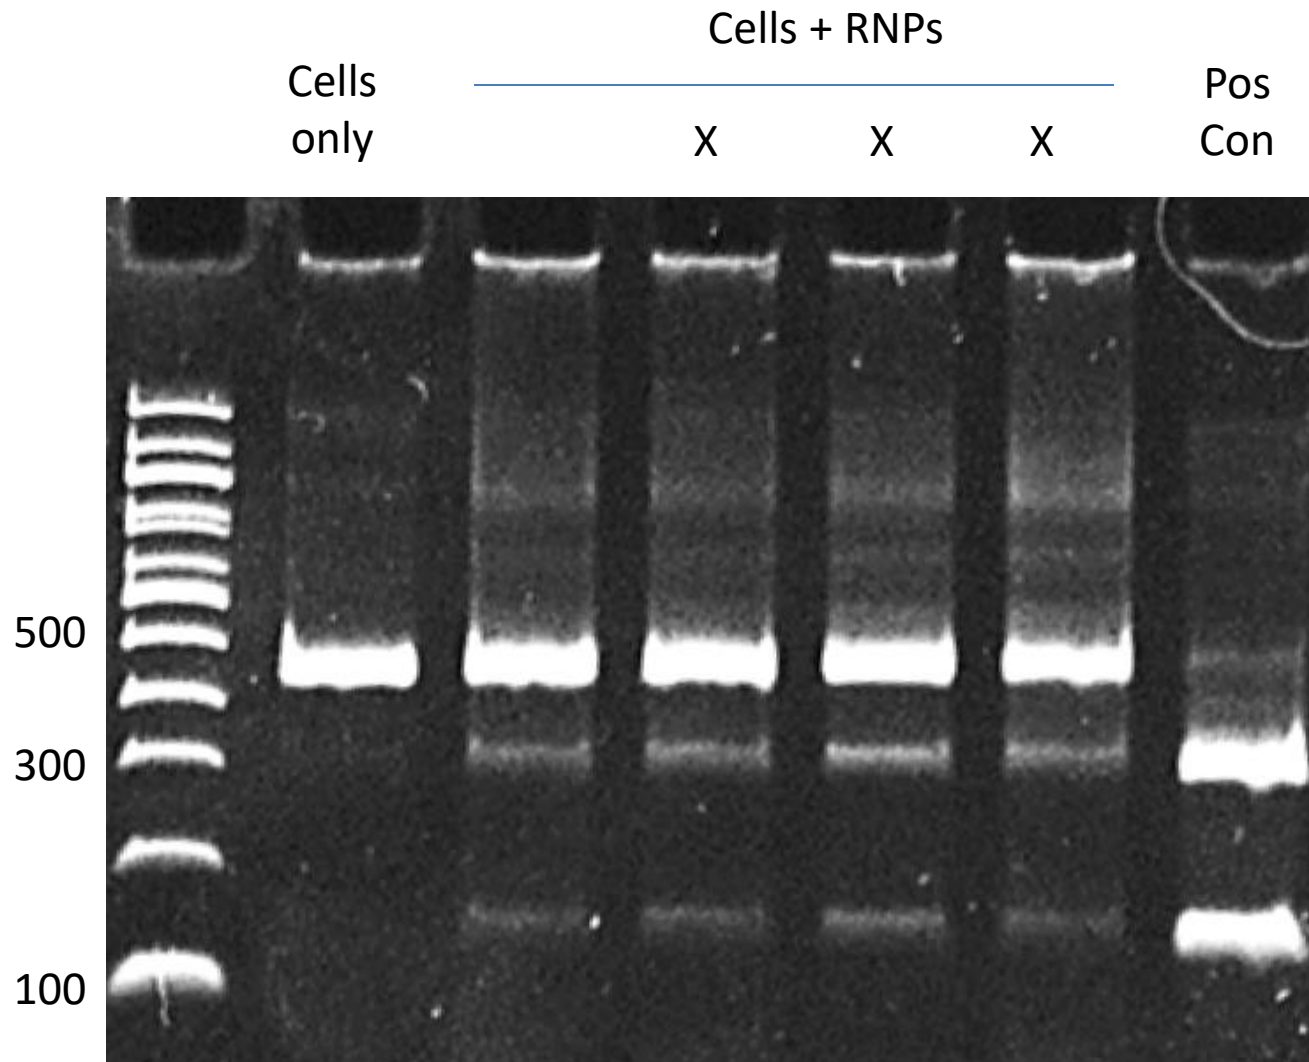



# Supplemental Figure 2 Source Blot

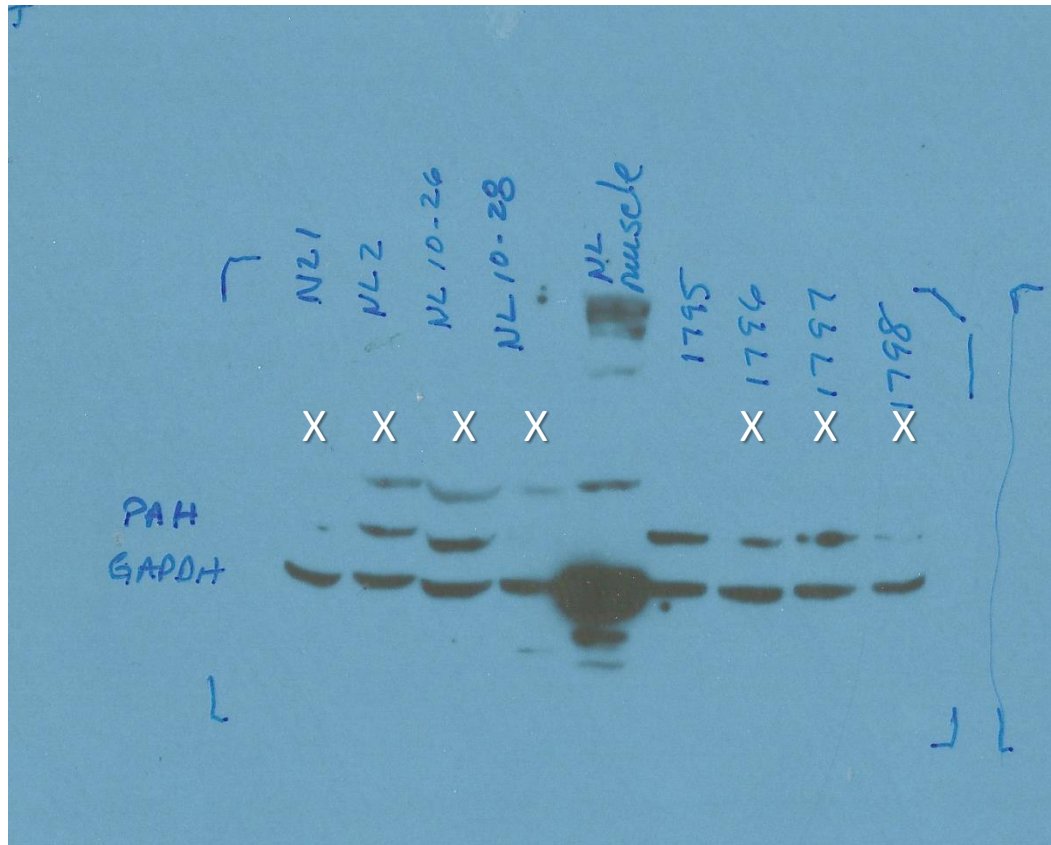

Supplement: pone.0245831.s004.pdf [file pone.0245831.s004.pdf]
